# Supplementary material for: High-Entropy Diborides – Silicon Carbide Composites by Reactive and Non-reactive Spark Plasma Sintering: A Comparative Study
Source: Preprints.org preprint supplement (doi:10.20944/preprints202312.1708.v1), 2023-12-22
Supplement: Supplementary file 1 [file supplementary]

Supplementary Material for

**High-entropy diborides - Silicon carbide composites by reactive and non-reactive spark plasma sintering: a comparative study**

Ekaterina Pakhomova, Giacomo Cao, Roberto Orrù,

Sebastiano Garroni, Paolo Ferro, Roberta Licheri

Supplementary **Figures S1-S4** and **Tables S1- S4**


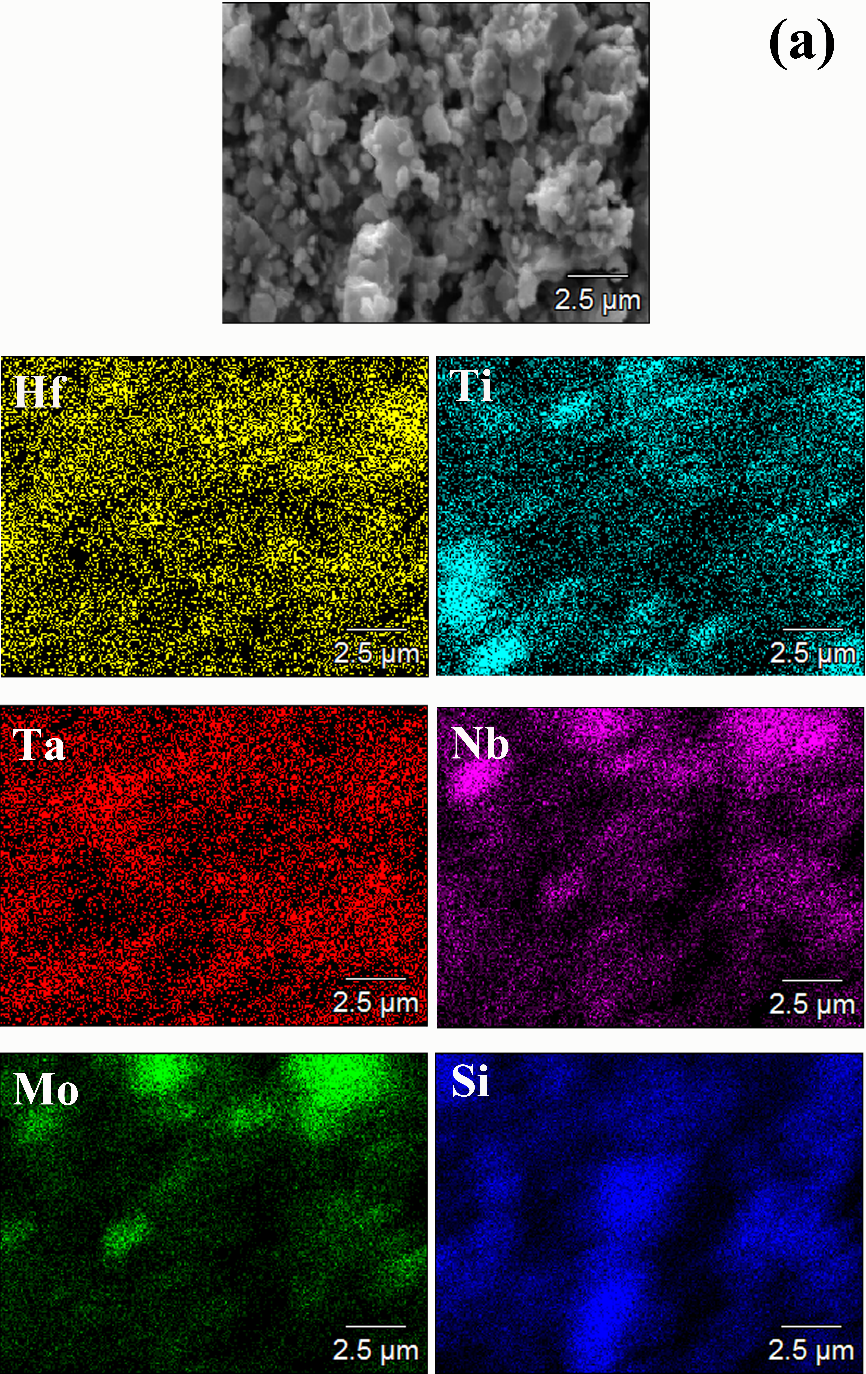

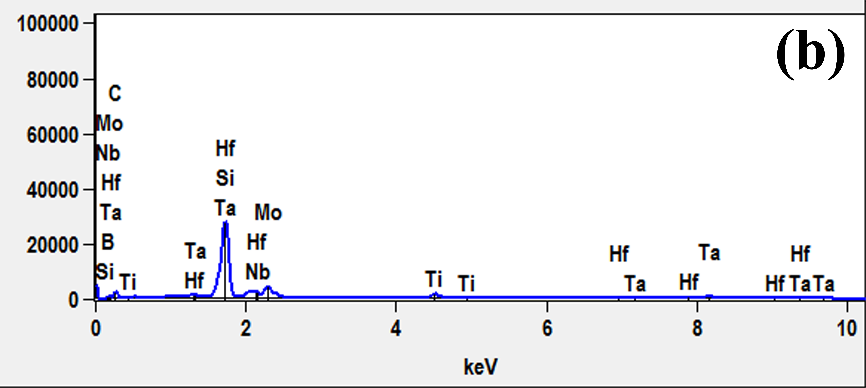


**Figure S1**. (a) SEM micrograph along with the corresponding EDS elemental maps, and (b) X-EDS pattern of HEB_Nb-SiC powders synthesized by SHS


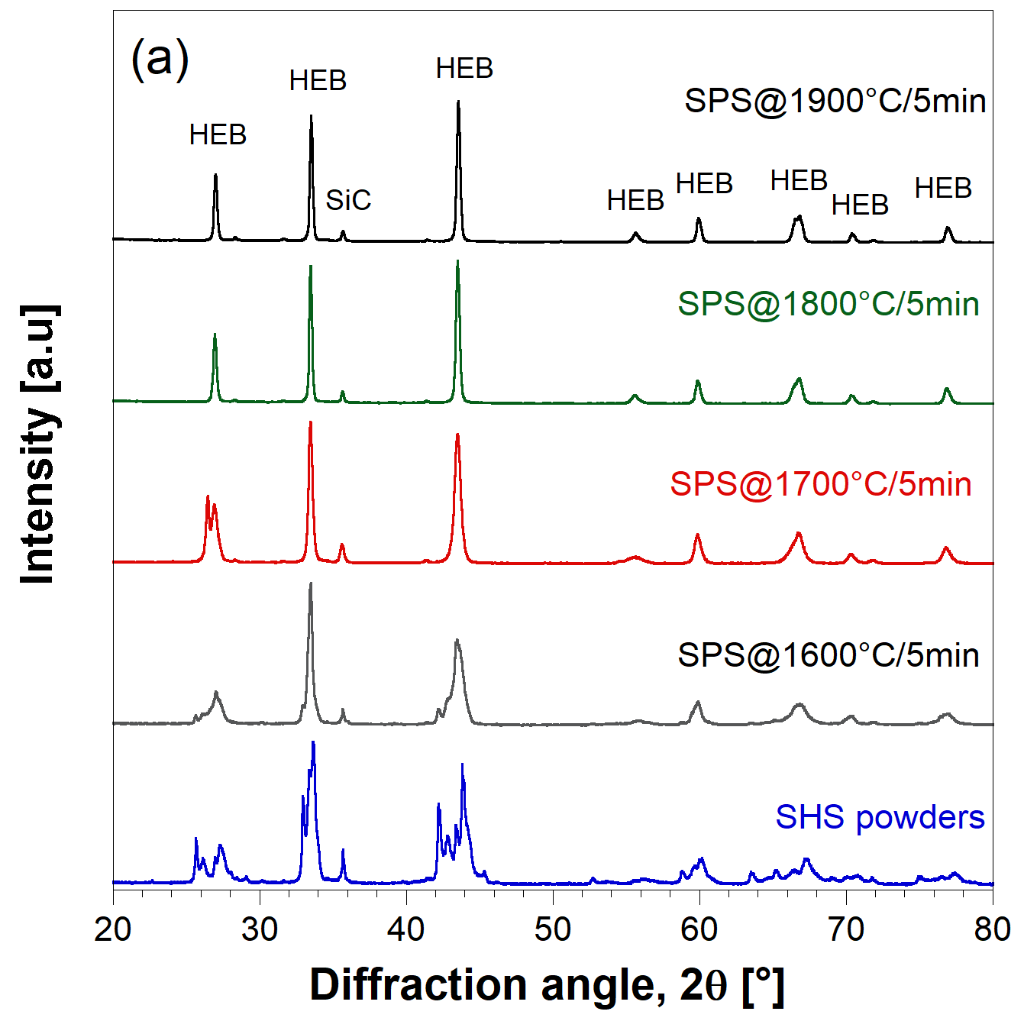

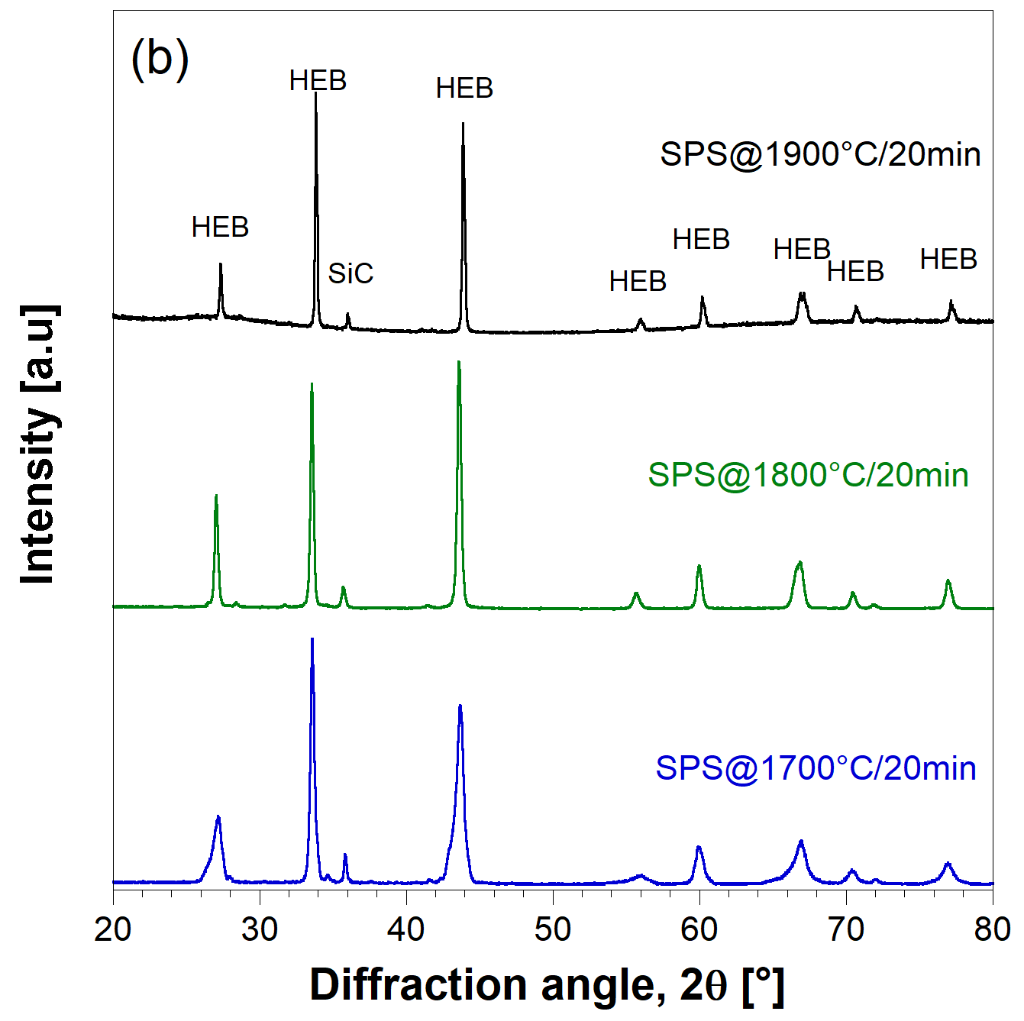


**Figure S2**. XRD patterns of HEB_Nb-SiC products obtained by SHS-SPS at different TD values: (a) tD=5 min, (b) tD=20 min. The XRD pattern of SHS powders is also included, for comparison.


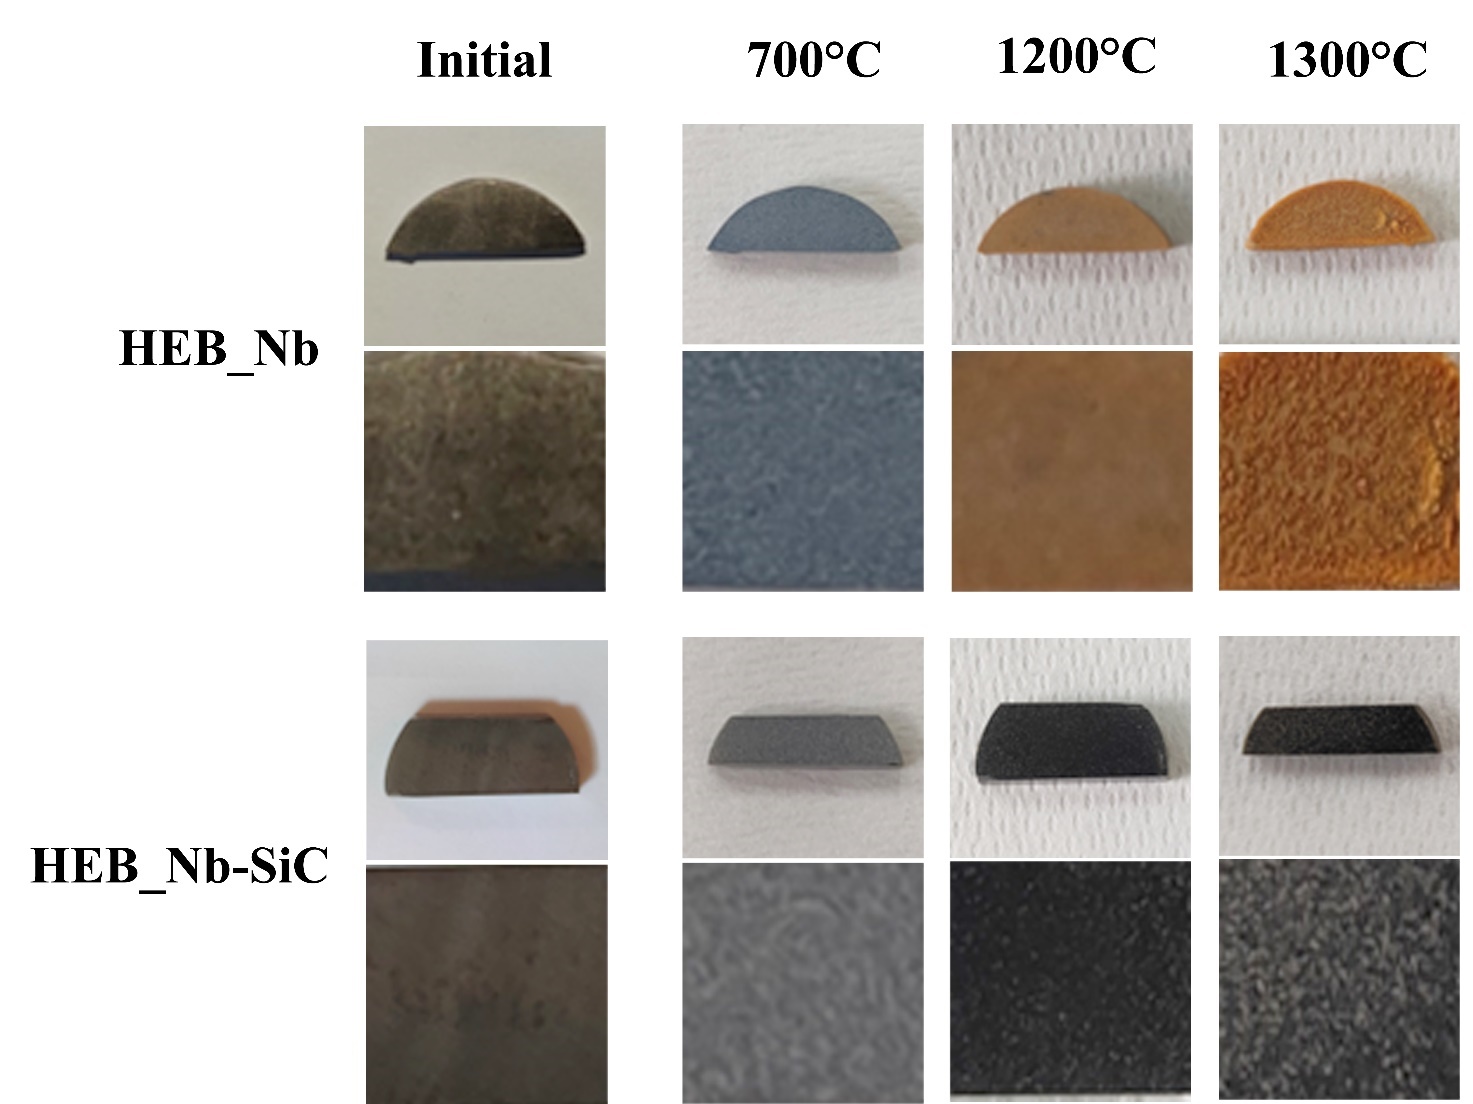


**Figure S3**. Optical images (complete and detailed view) showing the surface changes of (Hf0.2Mo0.2Ti0.2Ta0.2Nb0.2)B2 and (Hf0.2Mo0.2Ti0.2Ta0.2Nb0.2)B2-SiC samples after oxidation experiments in air furnace at different temperatures.


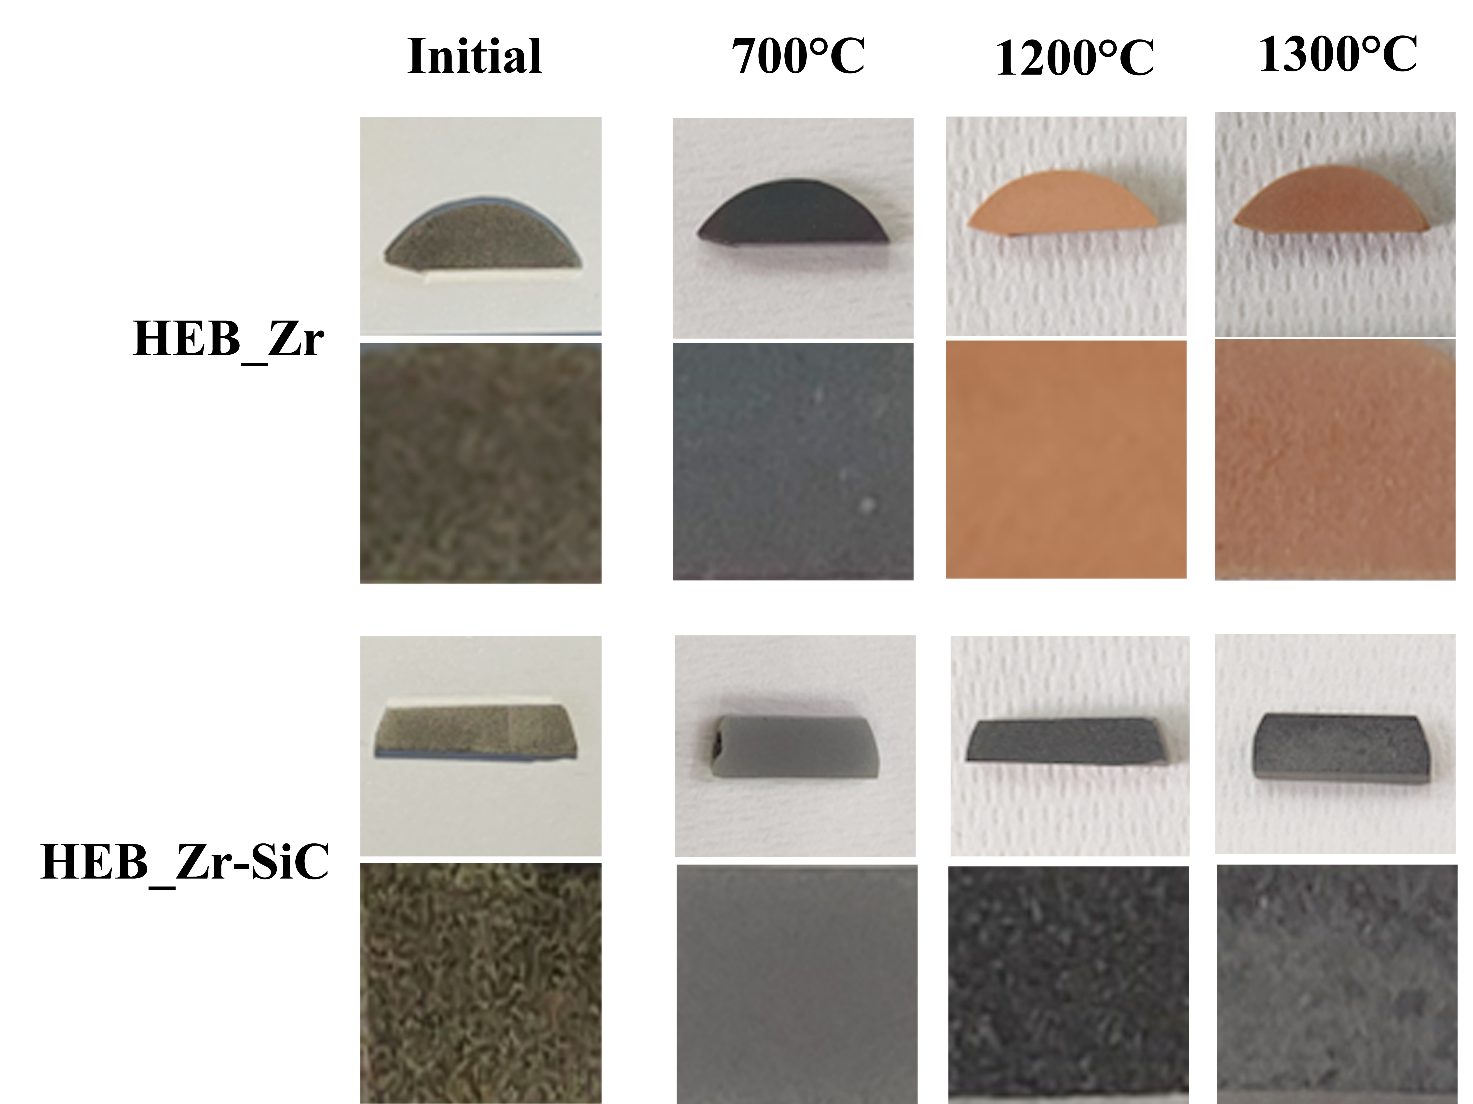


**Figure S4**. Optical images (complete and detailed view) showing the surface changes of (Hf0.2Mo0.2Ti0.2Ta0.2Zr0.2)B2 and (Hf0.2Mo0.2Ti0.2Ta0.2Zr0.2)B2-SiC samples after oxidation experiments in air furnace at different temperatures.

**Table S1**. Phases and quantitative phase analysis results of the **HEB_Nb-SiC** product obtained by Reactive SPS. (SS): Solid Solution

| **R-SPS (2000°C, 20 min)** | | | | | | | | | |
| --- | --- | --- | --- | --- | --- | --- | --- | --- | --- |
| **Phase** | **wt. (%)** | **a (Å)** | **b (Å)** | **c (Å)** | **β (°)** | **Symmetry** | **Space Group** | **Crystallite size (Å)** | **Microstrain** |
| (Hf0.2Mo0.2Ti0.2Ta0.2Nb0.2)B2 (SS)-1 | 20.4 | 3.0974 | - | 3.3196 | - | Hexagonal | P6/mmm | 1104 | 4.59 E-4 |
| (Hf0.2Mo0.2Ti0.2Ta0.2Nb0.2)B2 (SS)-2 | 20.3 | 3.0904 | - | 3.3032 | - | Hexagonal | P6/mmm | 1092 | 1.14 E-3 |
| SiC | 12.8 | 4.3529 | - | 3.3196 | - | Cubic | F-43m | >1500 | 1.24 E-3 |
| MoB2 | 16.7 | 3.1030 | - | 3.2118 | - | Hexagonal | P6/mmm | 988 | 1.53 E-4 |
| NbB2 | 15.1 | 3.0746 | - | 3.2620 | - | Hexagonal | P6/mmm | 1006 | 1.82 E-3 |
| (Ta0.5Ti0.5)B2 | 14.7 | 3.0496 | - | 3.2381 | - | Hexagonal | P6/mmm | 991 | 1.58 E-4 |

**Table S2**. Phases and quantitative phase analysis results of the **HEB_Nb-SiC** product obtained by SHS

| **SHS** | | | | | | | | | |
| --- | --- | --- | --- | --- | --- | --- | --- | --- | --- |
| **Phase** | **wt. (%)** | **a (Å)** | **b (Å)** | **c (Å)** | **β (°)** | **Symmetry** | **Space Group** | **Crystallite size (Å)** | **Microstrain** |
| (Hf0.2Mo0.2Ti0.2Ta0.2Nb0.2)B2 | 14.9 | 3.1051 | - | 3.4182 | - | Hexagonal | P6/mmm | 845 | 4.93 E-3 |
| SiC | 11.5 | 4.3614 | - | - | - | Cubic | F-43m | >1500 | 3.09 E-3 |
| TaB2 | 14.6 | 3.0769 | - | 3.2720 | - | Hexagonal | P6/mmm | 1125 | 2.15 E-3 |
| TiB2 | 13.4 | 3.0566 | - | 3.2437 | - | Hexagonal | P6/mmm | 1382 | 4.21E-3 |
| NbB2 | 12.8 | 3.1014 | - | 3.3110 | - | Hexagonal | P6/mmm | 1265 | 1.58 E-3 |
| MoB2 | 9.5 | 2.9870 | - | 3.1920 | - | Hexagonal | P6/mmm | 1038 | 5.56 E-3 |
| HfB2 | 9.0 | 3.1412 | - | 3.4739 | - | Hexagonal | P6/mmm | 1227 | 1.21 E-3 |
| (MoTi)B4 | 3.9 | 3.2788 | - | 2.6036 | - | Hexagonal | P6/mmm | 799 | 1.46 E-3 |
| MoSi2 | 2.9 | 3.2088 | - | 7.8529 | - | Tetragonal | I4/mmm | 1077 | 9.54 E-4 |
| C | 2.9 | 2.4646 | - | 6.7332 | - | Hexagonal | P63mc | 1030 | 1.28 E-3 |
| SiO2 | 1.7 | 7.0669 | 12.3077 | 7.1960 | 120.4 | Monoclinic | C2/c:b1 | 896 | 1.34 E-3 |
| Si | 1.6 | 5.4375 | - | - | - | Cubic | Fd-3m:1 | 972 | 1.43 E-3 |
| B4C | 1.3 | 5.6010 | - | 12.2410 | - | Trigonal | R-3m:H | 978 | 1.1 E-4 |

**Table S3**. Phases and quantitative phase analysis results of the **HEB_Nb-SiC** products obtained by SPS, at different operating conditions, from SHS powders.

| **SPS (1800°C, 20 min)** | | | | | | | | | |
| --- | --- | --- | --- | --- | --- | --- | --- | --- | --- |
| **Phase** | **wt. (%)** | **a (Å)** | **b (Å)** | **c (Å)** | **β (°)** | **Symmetry** | **Space Group** | **Crystallite size (Å)** | **Microstrain** |
| (Hf0.2Mo0.2Ti0.2Ta0.2Nb0.2)B2 | 83.1 | 3.0887 | - | 3.3035 | - | Hexagonal | P6/mmm | 1089 | 1.33 E-3 |
| SiC | 13.6 | 4.3605 | - | - | - | Cubic | F-43m | >1500 | 1.43 E-3 |
| HfO2 | 2.4 | 5.1201 | 5.1748 | 5.2851 | 99.1 | Monoclinic | P21/c:b1 | 974 | 3.33 E-3 |
| C | 0.9 | 2.4584 | - | 6.7480 | - | Hexagonal | P63mc | 1005 | 2.72E-4 |

| **SPS (1900°C, 5 min)** | | | | | | | | | |
| --- | --- | --- | --- | --- | --- | --- | --- | --- | --- |
| **Phase** | **wt. (%)** | **a (Å)** | **b (Å)** | **c (Å)** | **β (°)** | **Symmetry** | **Space Group** | **Crystallite size (Å)** | **Microstrain** |
| (Hf0.2Mo0.2Ti0.2Ta0.2Nb0.2)B2 | 85.6 | 3.0887 | - | 3.3035 | - | Hexagonal | P6/mmm | 1319 | 1.52 E-4 |
| SiC | 13.0 | 4.3605 | - | - | - | Cubic | F-43m | >1500 | 1.03 E-3 |
| HfO2 | 1.4 | 5.1201 | 5.1748 | 5.2851 | 99.1 | Monoclinic | P21/c:b1 | 993 | 6.05 E-4 |

| **SPS (1900°C, 20 min)** | | | | | | | | | |
| --- | --- | --- | --- | --- | --- | --- | --- | --- | --- |
| **Phase** | **wt. (%)** | **a (Å)** | **b (Å)** | **c (Å)** | **β (°)** | **Symmetry** | **Space Group** | **Crystallite size (Å)** | **Microstrain** |
| (Hf0.2Mo0.2Ti0.2Ta0.2Nb0.2)B2 | 85.2 | 3.0891 | - | 3.3027 | - | Hexagonal | P6/mmm | 1517 | 1.04 E-4 |
| SiC | 13.7 | 4.3611 | - | - | - | Cubic | F-43m | >1500 | 1.31 E-3 |
| HfO2 | 1.1 | 5.1248 | 5.1777 | 5.2948 | 99.3 | Monoclinic | P21/c:b1 | 1069 | 1.21 E-4 |

**Table S4**. Phases and quantitative phase analysis results of the **HEB_Zr-SiC** products obtained by SHS, and SPS.

| **SHS** | | | | | | | | | |
| --- | --- | --- | --- | --- | --- | --- | --- | --- | --- |
| **Phase** | **wt. (%)** | **a (Å)** | **b (Å)** | **c (Å)** | **β (°)** | **Symmetry** | **Space Group** | **Crystallite size (Å)** | **Microstrain** |
| (Hf0.2Mo0.2Ti0.2Ta0.2Zr0.2)B2 | 11.9 | 3.1091 | - | 3.4226 | - | Hexagonal | P6/mmm | 1032 | 5.28 E-3 |
| (MoTi)B4 | 3.4 | 3.2902 | - | 2.5892 | - | Hexagonal | P6/mmm | 845 | 3.66 E-3 |
| ZrB2 | 13.7 | 3.0969 | - | 3.3188 | - | Hexagonal | P6/mmm | 1430 | 3.52 E-3 |
| TaB2 | 15.2 | 3.0758 | - | 3.2806 | - | Hexagonal | P6/mmm | 1197 | 2.67 E-3 |
| HfB2 | 10.7 | 3.1405 | - | 3.4731 | - | Hexagonal | P6/mmm | 1275 | 2.45 E-3 |
| SiC | 10.9 | 4.3613 | - | - | - | Cubic | F-43m | >1500 | 5.55 E-4 |
| MoB2 | 10.8 | 2.9741 | - | 3.1920 | - | - | P6/mmm | 1039 | 2.69 E-3 |
| TiB2 | 14.6 | 3.0567 | - | 3.2424 | - | - | P6/mmm | 1383 | 4.17E-3 |
| MoSi2 | 2.6 | 3.2086 | - | 7.8408 | - | - | I4/mmm | 1062 | 1.24 E-3 |
| SiO2 | 1.9 | 7.0685 | 12.3074 | 7.1961 | 120.4 | Monoclinic | C2/c:b1 | 799 | 7.45 E-3 |
| C | 1.8 | 2.4677 | - | 6.7188 | - | Hexagonal | P63mc | 1030 | 1.17 E-3 |
| Si | 1.3 | 5.4378 | - | - | - | Cubic | Fd-3m:1 | 972 | 2.32 E-3 |
| B4C | 1.2 | 5.6005 | - | 12.2459 | - | Trigonal | R-3m:H | 999 | 7.86 E-4 |

| **SPS (1800°C, 20 min)** | | | | | | | | | |
| --- | --- | --- | --- | --- | --- | --- | --- | --- | --- |
| **Phase** | **wt. (%)** | **a (Å)** | **b (Å)** | **c (Å)** | **β (°)** | **Symmetry** | **Space Group** | **Crystallite size (Å)** | **Microstrain** |
| (Hf0.2Mo0.2Ti0.2Ta0.2Zr0.2)B2 | 84.4 | 3.0976 | - | 3.3628 | - | Hexagonal | P6/mmm | 1229 | 8.30 E-4 |
| SiC | 14.1 | 4.3593 | - | - | - | Cubic | F-43m | >1500 | 4.50 E-4 |
| HfO2 | 1.5 | 5.1958 | 5.2193 | 5.3845 | 99.2 | Monoclinic | P21/c:b1 | 1069 | 1.21 E-4 |
